# Supplementary material
Source: PubMed Central journal article supplement (PMC4132657)
Supplement: NIHMS609164-supplement-Supp_Material.pdf [file NIHMS609164-supplement-Supp_Material.pdf]

## SUPPORTING INFORMATION FOR

The *Yersinia pestis* Yersiniabactin Siderophore and the ZnuABC system both contribute to Zinc acquisition and the development of lethal septicemic plague in mice

By

Alexander G. Bobrov<sup>a</sup>, Olga Kirillina<sup>a</sup>, Jacqueline D. Fetherston<sup>a</sup>, M. Clarke Miller<sup>b</sup>, Joseph A. Burlison<sup>b</sup>, and Robert D. Perry<sup>a†</sup>

<sup>a</sup> Department of Microbiology, Immunology, and Molecular Genetics, University of Kentucky, Lexington, KY

<sup>b</sup> James Graham Brown Cancer Center, University of Louisville, Louisville, KY

<sup>†</sup> For correspondence. E-mail [rperry@uky.edu](mailto:rperry@uky.edu); Tel (+1) 859 323-6341; Fax (+1) 859 257

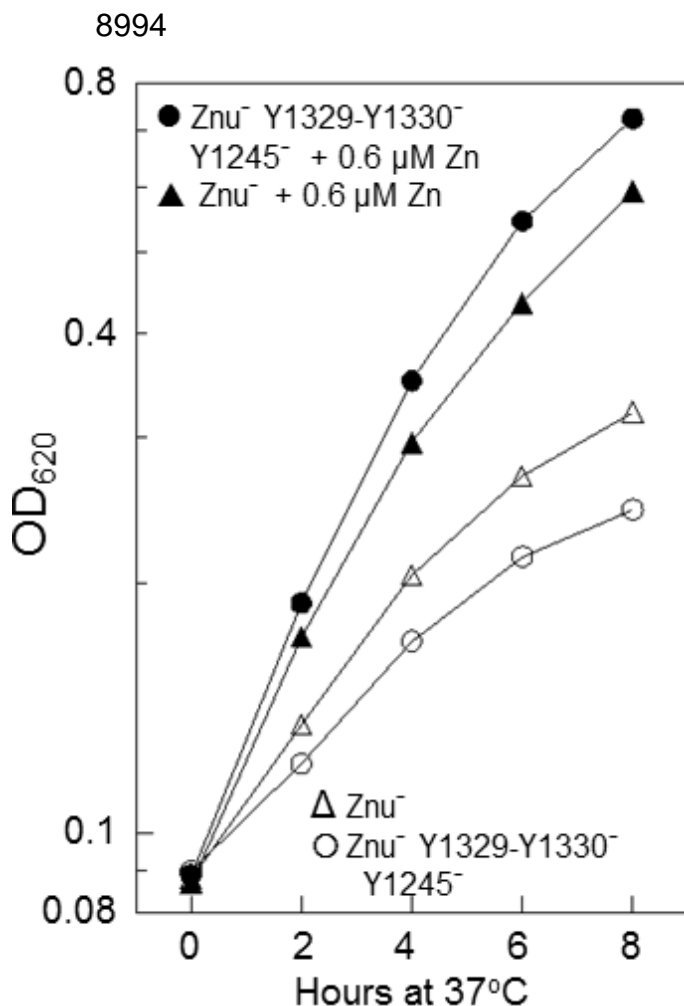

**FIG. S1.** The *Y. pestis* ZevAB orthologues (Y1329-Y1330) and Y1245 do not contribute significantly to *in vitro* Zn<sup>2+</sup> acquisition by a *znuBC* mutant. Cells were grown at 37°C in Chelex-100-treated PMH2 with no additions (open symbols) or with 0.6 μM ZnCl<sub>2</sub> supplementation (closed symbols). Strains: KIM6-2077+ (Znu<sup>-</sup> [ $\Delta znuBC$ ]) and KIM6-2077.17+ (Znu<sup>-</sup> Y1329-Y1330<sup>-</sup> Y1245<sup>-</sup> [ $\Delta znuBC \Delta y1329-y1330::kan \Delta y1245::cam$ ]).

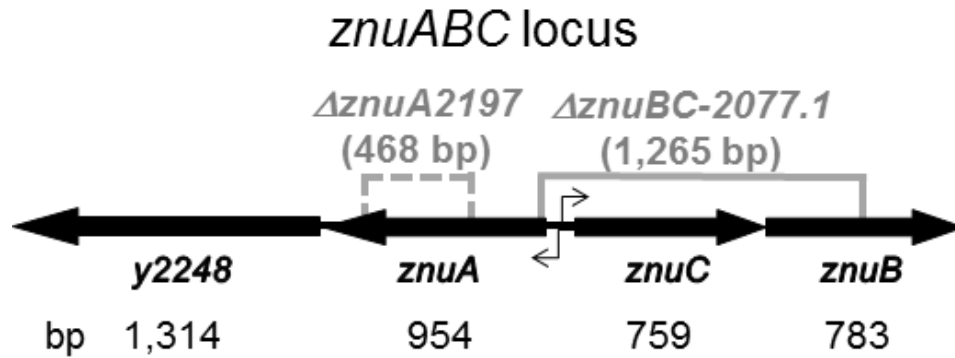

**Fig. S2.** Genetic organization of the *Y. pestis znuABC* locus. ORF arrows show the direction of transcription of the indicated genes and are drawn to scale. Small arrows indicate the divergent promoters in the 75 bp space between *znuA* and *znuC*. Locations and sizes of the  $\Delta znuBC2077.1$  and  $\Delta znuA2197$  mutations are shown.

Table S1. Bacterial strains, plasmids and primers used in this study.

| Strain <sup>a</sup>             | Relevant characteristics <sup>b</sup>                                                                                                                                                                                                           | Reference or source               |
|---------------------------------|-------------------------------------------------------------------------------------------------------------------------------------------------------------------------------------------------------------------------------------------------|-----------------------------------|
| <i>E. coli</i> strains          |                                                                                                                                                                                                                                                 |                                   |
| DH5 $\alpha$                    | Cloning strain                                                                                                                                                                                                                                  | (Ausubel <i>et al.</i> , 1987)    |
| DH5 $\alpha$ $\lambda$ pir      | Cloning strain for propagating plasmids with R6K origins; derived from DH5 $\alpha$                                                                                                                                                             | S.C. Straley                      |
| <i>Y. pestis</i> strains        |                                                                                                                                                                                                                                                 |                                   |
| KIM5 (pCD1Ap) <sup>+</sup>      | Ap <sup>r</sup> Pgm <sup>+</sup> Lcr <sup>+</sup> ; pMT1, pCD1Ap ( <i>yadA::bla</i> ), pPCP1                                                                                                                                                    | (Gong <i>et al.</i> , 2001)       |
| KIM5 (pCD1Ap)                   | Ap <sup>r</sup> Pgm <sup>-</sup> ( $\Delta$ <i>pgm</i> ; Ybt <sup>-</sup> Hms <sup>-</sup> ) Lcr <sup>+</sup> ; pMT1, pCD1Ap ( <i>yadA::bla</i> ), pPCP1                                                                                        | (Fetherston <i>et al.</i> , 2010) |
| KIM5-2045.6 (pCD1Ap)            | Km <sup>r</sup> Hms <sup>+</sup> Ybt <sup>-</sup> ( $\Delta$ <i>psn::kan2045.6</i> ) Lcr <sup>-</sup> ; pMT1, pPCP1                                                                                                                             | (Fetherston <i>et al.</i> , 2010) |
| KIM5-2046.1 (pCD1Ap)            | Km <sup>r</sup> Ybt <sup>-</sup> ( <i>irp2::kan2046.1</i> ) Hms <sup>+</sup> Lcr <sup>-</sup> ; pMT1, pPCP1                                                                                                                                     | (Fetherston <i>et al.</i> , 2010) |
| KIM5-2077 (pCD1Ap) <sup>+</sup> | Ap <sup>r</sup> Pgm <sup>+</sup> Znu <sup>-</sup> ( $\Delta$ <i>znuBC2077</i> ) Lcr <sup>+</sup> ; pMT1, pCD1Ap ( <i>yadA::bla</i> ), pPCP1; pCD1Ap electroporated into KIM6-2077 <sup>+</sup>                                                  | (Desrosiers <i>et al.</i> , 2010) |
| KIM5-2077 (pCD1Ap)              | Ap <sup>r</sup> Pgm <sup>-</sup> ( $\Delta$ <i>pgm</i> ; Ybt <sup>-</sup> Hms <sup>-</sup> ) Znu <sup>-</sup> ( $\Delta$ <i>znuBC2077</i> ) Lcr <sup>+</sup> ; pMT1, pCD1Ap ( <i>yadA::bla</i> ), pPCP1; pCD1Ap electroporated into KIM6-2077   | This study                        |
| KIM5-2077.7 (pCD1Ap)            | Ap <sup>r</sup> Km <sup>r</sup> Hms <sup>+</sup> Znu <sup>-</sup> ( $\Delta$ <i>znuBC2077</i> ) Ybt <sup>-</sup> ( <i>irp2::kan2046.1</i> ) Lcr <sup>+</sup> ; pMT1, pCD1Ap ( <i>yadA::bla</i> ), pPCP1; pCD1Ap electroporated into KIM6-2077.7 | This study                        |
| KIM5-2077.8 (pCD1Ap)            | Ap <sup>r</sup> Hms <sup>+</sup> Ybt <sup>-</sup> (in-frame $\Delta$ <i>irp2-2046.3</i> ) Znu <sup>-</sup>                                                                                                                                      | This study                        |

|                       |                                                                                                                                                                                                                                                                                  |                                   |
|-----------------------|----------------------------------------------------------------------------------------------------------------------------------------------------------------------------------------------------------------------------------------------------------------------------------|-----------------------------------|
|                       | ( $\Delta znuBC2077$ ) Lcr <sup>+</sup> ; pMT1, pCD1Ap ( <i>yadA::bla</i> ), pPCP1; pCD1Ap electroporated into KIM6-2077.8                                                                                                                                                       |                                   |
| KIM5-2077.9 (pCD1Ap)  | Km <sup>r</sup> Ap <sup>r</sup> Hms <sup>+</sup> Ybt <sup>-</sup> ( $\Delta psn::kan2045.6$ ) Znu <sup>-</sup> ( $\Delta znuBC2077$ ) Lcr <sup>+</sup> ; pMT1, pCD1Ap ( <i>yadA::bla</i> ), pPCP1; pCD1Ap electroporated into KIM6-2077.9                                        | This study                        |
| KIM5-2077.10 (pCD1Ap) | Km <sup>r</sup> Ap <sup>r</sup> Pgm <sup>-</sup> ( $\Delta pgm$ ; Ybt <sup>-</sup> Hms <sup>-</sup> ) Znu <sup>+</sup> ( $\Delta znuBC2077/attTn7::mini-Tn7T-Km-znuABC^+$ ) Lcr <sup>+</sup> ; pMT1, pCD1Ap ( <i>yadA::bla</i> ), pPCP1; pCD1Ap electroporated into KIM6-2077.10 | This study                        |
| KIM5-2197 (pCD1Ap)+   | Ap <sup>r</sup> Pgm <sup>+</sup> Znu <sup>-</sup> (in frame $\Delta znuA2197$ ) Lcr <sup>+</sup> ; pMT1, pCD1Ap ( <i>yadA::bla</i> ), pPCP1; pCD1Ap electroporated into KIM6+                                                                                                    | This study                        |
| KIM5-2197 (pCD1Ap)    | Ap <sup>r</sup> Pgm <sup>-</sup> ( $\Delta pgm$ ; Ybt <sup>-</sup> Hms <sup>-</sup> ) ZnuA <sup>-</sup> (in frame $\Delta znuA2197$ ) Lcr <sup>+</sup> ; pMT1, pCD1Ap ( <i>yadA::bla</i> ), pPCP1; $\Delta znuA2197$ was introduced into KIM5(pCD1Ap)                            | This study                        |
| KIM5-2197.1 (pCD1Ap)  | Hms <sup>+</sup> ZnuA <sup>-</sup> (in frame $\Delta znuA2197$ ) Ybt <sup>-</sup> (in frame $\Delta irp2-2046.3$ ) Lcr <sup>+</sup> ; pMT1, pCD1Ap ( <i>yadA::bla</i> ), pPCP1; pCD1Ap electroporated into KIM6-2197.1                                                           | This study                        |
| KIM6+                 | Pgm <sup>+</sup> Lcr <sup>-</sup> ; pMT1, pPCP1                                                                                                                                                                                                                                  | (Fetherston <i>et al.</i> , 1992) |
| KIM6                  | Pgm <sup>-</sup> ( $\Delta pgm$ ; Ybt <sup>-</sup> Hms <sup>-</sup> ) Lcr <sup>-</sup> ; pMT1, pPCP1                                                                                                                                                                             | (Fetherston <i>et al.</i> , 1992) |
| KIM6-2045.1           | Hms <sup>+</sup> Ybt <sup>-</sup> ( $\Delta psn2045.1$ ) Lcr <sup>-</sup> ; pMT1, pPCP1                                                                                                                                                                                          | (Fetherston <i>et al.</i> , 1995) |
| KIM6-2045.6           | Km <sup>r</sup> Hms <sup>+</sup> Ybt <sup>-</sup> ( $\Delta psn::kan2045.6$ ) Lcr <sup>-</sup> ; pMT1, pPCP1                                                                                                                                                                     | (Fetherston <i>et al.</i> , 1996) |
| KIM6-2046.1           | Km <sup>r</sup> Ybt <sup>-</sup> ( <i>irp2::kan2046.1</i> ) Hms <sup>+</sup> Lcr <sup>-</sup> ; pMT1, pPCP1                                                                                                                                                                      | (Fetherston <i>et al.</i> , 1995) |
| KIM6-2046.3           | Hms <sup>+</sup> Ybt <sup>-</sup> (in-frame $\Delta irp2-2046.3$ ) Lcr <sup>-</sup> ; pMT1, pPCP1                                                                                                                                                                                | (Bearden <i>et al.</i> , 1997)    |
| KIM6-2066             | Hms <sup>+</sup> Ybt <sup>-</sup> ( $\Delta ybtQX2066$ ) Lcr <sup>-</sup> ; pMT1, pPCP1                                                                                                                                                                                          | (Fetherston <i>et al.</i> , 1999) |
| KIM6-2067             | Hms <sup>+</sup> YbtX <sup>-</sup> (in-frame $\Delta ybtX2067$ ) Lcr <sup>-</sup> ; pMT1, pPCP1                                                                                                                                                                                  | Fetherston <i>et al.</i> , 1999)  |
| KIM6-2071             | Hms <sup>+</sup> Ybt <sup>-</sup> (in frame $\Delta ybtU2071$ ) Lcr <sup>-</sup> ; pMT1, pPCP1                                                                                                                                                                                   | (Geoffroy <i>et al.</i> , 2000)   |
| KIM6-2073+            | Km <sup>r</sup> Pgm <sup>+</sup> TonB <sup>-</sup> ( <i>tonB::kan2073</i> ) Lcr <sup>-</sup> ; pMT1, pPCP1                                                                                                                                                                       | (Perry <i>et al.</i> , 2003b)     |
| KIM6-2077+            | Pgm <sup>+</sup> Znu <sup>-</sup> ( $\Delta znuBC2077$ ) Lcr <sup>-</sup> ; pMT1, pPCP1                                                                                                                                                                                          | (Hazlett <i>et al.</i> , 2003)    |
| KIM6-2077             | Pgm <sup>-</sup> ( $\Delta pgm$ ; Ybt <sup>-</sup> Hms <sup>-</sup> ) Znu <sup>-</sup> ( $\Delta znuBC2077$ ) Lcr <sup>-</sup> ; pMT1, pPCP                                                                                                                                      | (Desrosiers <i>et al.</i> , 2010) |
| KIM6-2077.7           | Km <sup>r</sup> Hms <sup>+</sup> Ybt <sup>-</sup> ( <i>irp2::kan2046.1</i> ) Znu <sup>-</sup> ( $\Delta znuBC2077$ ) Lcr <sup>-</sup> ; pMT1, pPCP1; derived from KIM6-2077+                                                                                                     | This study                        |

|               |                                                                                                                                                                                                                                                                             |            |
|---------------|-----------------------------------------------------------------------------------------------------------------------------------------------------------------------------------------------------------------------------------------------------------------------------|------------|
| KIM6-2077.8   | Hms <sup>+</sup> Ybt <sup>-</sup> (in-frame $\Delta irp2-2046.3$ ) Znu <sup>-</sup> ( $\Delta znuBC2077$ ) Lcr <sup>-</sup> ; pMT1, pPCP1; derived from KIM6-2046.3                                                                                                         | This study |
| KIM6-2077.9   | Km <sup>r</sup> Hms <sup>+</sup> Ybt <sup>-</sup> ( $\Delta psn::kan2045.6$ ) Znu <sup>-</sup> ( $\Delta znuBC2077$ ) Lcr <sup>-</sup> ; pMT1, pPCP1; derived from KIM6-2045.6                                                                                              | This study |
| KIM6-2077.10+ | Km <sup>r</sup> Pgm <sup>+</sup> Znu <sup>+</sup> ( $\Delta znuBC2077/ attTn7::mini-Tn7T-Km-znuABC^+$ ) Lcr <sup>-</sup> ; pMT1, pPCP1; derived from KIM6-2077+                                                                                                             | This study |
| KIM6-2077.10  | Km <sup>r</sup> Pgm <sup>-</sup> ( $\Delta pgm$ ; Ybt <sup>-</sup> Hms <sup>-</sup> ) Znu <sup>+</sup> ( $\Delta znuBC2077/ attTn7::mini-Tn7T-Km-znuABC^+$ ) Lcr <sup>-</sup> ; pMT1, pPCP1; derived from KIM6-2077                                                         | This study |
| KIM6-2077.11+ | Km <sup>r</sup> Pgm <sup>+</sup> Znu <sup>-</sup> ( $\Delta znuBC2077$ ) TonB <sup>-</sup> ( $tonB::kan2073$ ) Lcr <sup>-</sup> ; pMT1, pPCP1; derived from KIM6-2073+                                                                                                      | This study |
| KIM6-2077.12+ | Km <sup>r</sup> Pgm <sup>+</sup> Znu <sup>-</sup> ( $\Delta znuBC2077$ ) TonB <sup>-</sup> ( $tonB::kan2073$ ) HasB <sup>-</sup> ( $\Delta hasB2080$ ) Lcr <sup>-</sup> ; pMT1, pPCP1; derived from KIM6-2077.11+                                                           | This study |
| KIM6-2077.13  | Hms <sup>+</sup> Ybt <sup>-</sup> ( $\Delta ybtQX-2066$ ) Znu <sup>-</sup> ( $\Delta znuBC2077$ ) Lcr <sup>-</sup> ; pMT1, pPCP1; derived from KIM6-2066                                                                                                                    | This study |
| KIM6-2077.14  | Hms <sup>+</sup> Znu <sup>-</sup> ( $\Delta znuBC2077$ ) Psn <sup>-</sup> (in-frame $\Delta psn2045.1$ ) Lcr <sup>-</sup> ; pMT1, pPCP1; derived from KIM6-2077+                                                                                                            | This study |
| KIM6-2077.15  | Km <sup>r</sup> Hms <sup>+</sup> Ybt <sup>-</sup> (in-frame $\Delta irp2-2046.3$ ) Znu <sup>+</sup> ( $\Delta znuBC2077/ attTn7::mini-Tn7T-Km-znuABC^+$ ) Lcr <sup>-</sup> ; pMT1, pPCP1; derived from KIM6-2077.8                                                          | This study |
| KIM6-2077.16+ | Km <sup>r</sup> Hms <sup>+</sup> Znu <sup>-</sup> ( $\Delta znuBC2077$ ) $\Delta y1329-30::kan2199$ Lcr <sup>-</sup> ; pMT1, pPCP1; derived from KIM6-2077(pWL204)+                                                                                                         | This study |
| KIM6-2077.17+ | Km <sup>r</sup> Cm <sup>r</sup> Hms <sup>+</sup> Znu <sup>-</sup> ( $\Delta znuBC2077$ ) $\Delta y1329-30::kan2199$ $\Delta y1245::cat2187.1$ Lcr <sup>-</sup> ; pMT1, pPCP1; derived from KIM6-2077.16(pWL204)+                                                            | This study |
| KIM6-2077.18  | Km <sup>r</sup> Hms <sup>+</sup> Znu <sup>-</sup> ( $\Delta znuBC2077$ ) Psn <sup>-</sup> (in-frame $\Delta psn2045.1$ ) HMWP2 <sup>-</sup> ( $irp2::kan2046.1$ ) Lcr <sup>-</sup> ; pMT1, pPCP1; derived from KIM6-2077.14                                                 | This study |
| KIM6-2077.19  | Km <sup>r</sup> Hms <sup>+</sup> Znu <sup>-</sup> ( $\Delta znuBC2077$ ) Psn <sup>-</sup> (in-frame $\Delta psn2045.1$ ) HMWP2 <sup>-</sup> ( $irp2::kan2046.1$ ) YbtX <sup>-</sup> (in-frame $\Delta ybtX2067$ ) Lcr <sup>-</sup> ; pMT1, pPCP1; derived from KIM6-2077.18 | This study |
| KIM6-2197+    | Pgm <sup>+</sup> ZnuA <sup>-</sup> (in frame $\Delta znuA2197$ ) Lcr <sup>-</sup> ; pMT1, pPCP1; derived from KIM6+                                                                                                                                                         | This study |
| KIM6-2197.1   | Hms <sup>+</sup> Znu <sup>-</sup> (in frame $\Delta znuA2197$ ) Ybt <sup>-</sup> (in frame $\Delta irp2-2046.3$ ) Lcr <sup>-</sup> ; pMT1, pPCP1; derived from KIM6-2046.3                                                                                                  | This study |
| KIM6-2197.2   | Hms <sup>+</sup> Znu <sup>-</sup> (in frame $\Delta znuA2197$ ) YbtX <sup>-</sup> (in frame $\Delta ybtX2067$ ) Lcr <sup>-</sup> ; pMT1, pPCP1; derived from KIM6-2067                                                                                                      | This study |

|                         |                                                                                                                                                                                                                         |                                   |
|-------------------------|-------------------------------------------------------------------------------------------------------------------------------------------------------------------------------------------------------------------------|-----------------------------------|
| Plasmids                |                                                                                                                                                                                                                         |                                   |
| pACYC184                | 4.24 kb, Cm <sup>r</sup> , Tc <sup>r</sup> , low copy cloning vector                                                                                                                                                    | (Ausubel <i>et al.</i> , 1987)    |
| pBGL2                   | 4.8 kb, Ap <sup>r</sup> , Tc <sup>r</sup> ; low copy cloning vector                                                                                                                                                     | (Perry <i>et al.</i> , 1990)      |
| pBluescript-KS          | 3.0 kb, Ap <sup>r</sup> ; cloning vector                                                                                                                                                                                | Stratagene                        |
| pBSZnuA                 | 4.9 kb, Ap <sup>r</sup> , <i>znuA</i> <sup>+</sup> ; 1.9 kb <i>Hind</i> III/ <i>Pst</i> I fragment from pZnu2 ligated into the same sites in pBluescript-KS                                                             | This study                        |
| pBSΔZnuA                | 4.4 kb, Ap <sup>r</sup> , in frame Δ <i>znuA2197</i> ; <i>Hind</i> III/ <i>Xmn</i> I and <i>Pst</i> I/ <i>Fsp</i> I fragments from pBSznuA ligated into <i>Hind</i> III and <i>Pst</i> I sites of pBluescript-KS        | This study                        |
| pCD1Ap                  | 71.7 kb, Ap <sup>r</sup> , Lcr <sup>+</sup> ; pCD1 with <i>bla</i> cassette inserted into <i>yadA</i> downstream of the frameshift mutation in this pseudogene ( <i>yadA::bla</i> )                                     | (Gong <i>et al.</i> , 2001)       |
| pCIRP498.8              | 17.4 kb, Ap <sup>r</sup> , Km <sup>r</sup> , R6K ori, SacB <sup>+</sup> , <i>irp2::kan2046.1</i>                                                                                                                        | (Fetherston <i>et al.</i> , 1995) |
| pCVDYbtX                | 6.3 kb, Ap <sup>r</sup> , R6K ori, SacB <sup>+</sup> , in frame Δ <i>ybtX2067</i>                                                                                                                                       | (Fetherston <i>et al.</i> , 1999) |
| pEUIrp2                 | 15.4 kb, Spc <sup>r</sup> , <i>irp2::lacZ</i> (β-gal <sup>+</sup> );                                                                                                                                                    | (Perry <i>et al.</i> , 2003a)     |
| pEUZnu1                 | 15.5 kb, Spc <sup>r</sup> , <i>znuA::lacZ</i> (β-gal <sup>+</sup> ); 255-bp PCR amplicon ligated into <i>Asp</i> 718 of pEU730                                                                                          | (Desrosiers <i>et al.</i> , 2010) |
| pHas98                  | 16.1 kb, Km <sup>r</sup> , <i>hasRADEB</i> <sup>+</sup>                                                                                                                                                                 | (Rossi <i>et al.</i> , 2001)      |
| plrp2                   | 14.3 kb, Ap <sup>r</sup> , <i>irp2</i> <sup>+</sup> ; <i>irp2</i> gene cloned into pBGL2                                                                                                                                | (Bearden <i>et al.</i> , 1997)    |
| pKD3                    | 2.8 kb, Ap <sup>r</sup> , Cm <sup>r</sup> , template plasmid                                                                                                                                                            | (Datsenko and Wanner, 2000)       |
| pKD4                    | 3.3 kb, Ap <sup>r</sup> , Km <sup>r</sup> , template plasmid                                                                                                                                                            | (Datsenko and Wanner, 2000)       |
| pKNG101                 | 6.8 kb, Sm <sup>r</sup> , R6K ori SacB <sup>+</sup> suicide vector                                                                                                                                                      | (Kaniga <i>et al.</i> , 1991)     |
| pKNGΔtonB2 <sup>c</sup> | 8.7 kb, Sm <sup>r</sup> , R6K ori SacB <sup>+</sup> , Δ <i>hasB2080</i> ; suicide vector; 1.8 kb <i>Dra</i> I/ <i>Bam</i> HI fragment from pUC19ΔtonB2 ligated into the <i>Sma</i> I and <i>Bam</i> HI sites of pKNG101 | (Perry <i>et al.</i> , 2003b)     |
| pKNGΔznuA               | 8.3 kb Sm <sup>r</sup> , R6K ori SacB <sup>+</sup> , Δ <i>znuA2197</i> ; suicide vector; 1.5 kb <i>Sal</i> I/ <i>Xba</i> I fragment from pBSΔZnuA ligated into the same sites in pKNG101                                | This study                        |
| pPSN15                  | 8.9 kb, Ap <sup>r</sup> , R6K ori, SacB <sup>+</sup> , Δ <i>psn2045.1</i> ; suicide vector                                                                                                                              | (Fetherston <i>et al.</i> , 1995) |
| pSucZnu3.5              | 12.2 kb, Ap <sup>r</sup> , Δ <i>znuBC2077 sacB</i> <sup>+</sup> , R6K ori; in suicide vector pSUC1                                                                                                                      | (Hazlett <i>et al.</i> , 2003)    |
| pTNS2                   | 9.6 kb, Ap <sup>r</sup> , R6K ori, Tn7 transposase helper plasmid                                                                                                                                                       | (Choi <i>et al.</i> , 2005)       |
| pUC18R6K-               | 4.5 kb, Ap <sup>r</sup> , Km <sup>r</sup> , mini-Tn7T- <i>kan</i> , R6K ori suicide vector                                                                                                                              | (Choi and                         |

|                          |                                                                                                                                                                                                                                            |                                         |
|--------------------------|--------------------------------------------------------------------------------------------------------------------------------------------------------------------------------------------------------------------------------------------|-----------------------------------------|
| mini-Tn7T-Km             |                                                                                                                                                                                                                                            | Schweizer, 2006)                        |
| pUC18R6K-ZnuABC-Km       | 9.8 kb, Ap <sup>r</sup> , Km <sup>r</sup> , mini-Tn7T-kan, R6K ori suicide vector carrying <i>znuABC</i> <sup>+</sup>                                                                                                                      | This study                              |
| pUC19                    | 2.7 kb, Ap <sup>r</sup> , cloning vector                                                                                                                                                                                                   | (Yanisch-Perron <i>et al.</i> , 1985)   |
| pUC19ΔtonB2 <sup>c</sup> | 4.5 kb, Ap <sup>r</sup> , Δ <i>hasB2080</i> ; 2.3 kb <i>Bam</i> HI/ <i>Hind</i> III fragment from pHas98 ligated into the same sites in pUC19, then digested with <i>Hinc</i> II/ <i>Nru</i> I and the resulting 4.5 kb fragment religated | (Perry <i>et al.</i> , 2003b)           |
| pWL204                   | 8.2 kb, Ap <sup>r</sup> <i>sacB</i> <sup>+</sup> ; λ-red recombinase helper plasmid containing                                                                                                                                             | (Lathem <i>et al.</i> , 2007)           |
| pYbtPQ                   | 7.7 kb, Cm <sup>r</sup> , <i>ybtPQ</i> cloned into pACYC184                                                                                                                                                                                | (Fetherston <i>et al.</i> , 1999)       |
| pYbtPQX                  | 8.0 kb, Cm <sup>r</sup> , <i>ybtPQX</i> cloned into pACYC184                                                                                                                                                                               | (Fetherston <i>et al.</i> , 1999)       |
| pYbtX                    | 5.5 kb, Cm <sup>r</sup> , 3.4 kb DNA fragment ( <i>ybtPQ</i> ) was deleted from pYbtPQX using reverse SOE PCR; <i>ybtX</i> expressed from native promoter in pACYC184                                                                      | This study                              |
| pZnu2                    | 16.1 kb, Km <sup>r</sup> , <i>znuABC</i> <sup>+</sup> cloned into pWSK129                                                                                                                                                                  | (Desrosiers <i>et al.</i> , 2010)       |
| <i>Primer name</i>       | <i>Primer sequence (5'→3')</i>                                                                                                                                                                                                             | Purpose                                 |
| y1329red-Forw            | GACTTACAACCTTACATCACAGTAATTGCAGAATATC<br>CAAGGGTTGAATAGTGTAGGCTGGAGCTGCTTC                                                                                                                                                                 | construct<br>Δ <i>y1329-1330::kan</i>   |
| y1330red-Rev             | TCTGCAGCGTCAAGGTCGAAGGGTATCAGCGACC<br>AAATGGACGAACAGCCATATGAATATCCTCCTTAGT                                                                                                                                                                 | construct<br>Δ <i>y1329-1330::kan</i>   |
| y1245-KMI                | ATCTACCTGCTAATCGGCCTGTTGGTGGTGAATGG<br>GGTGTAGGCTGGAGCTGCTTC                                                                                                                                                                               | construct<br>Δ <i>y1245::cat</i>        |
| y1245-KMII               | AACTAACCAGCAACATATAAACATCCCTATAATCCA<br>CATATGAATATCCTCCTTAGT                                                                                                                                                                              | construct<br>Δ <i>y1245::cat</i>        |
| ZnuC.5                   | CCGAAGCCAGATTAAAGG                                                                                                                                                                                                                         | prepare<br>hybridization<br>probe       |
| ZnuC.3                   | GAAGGTACCGCAGAGAAAGGGAAATATCG                                                                                                                                                                                                              | prepare<br>hybridization<br>probe       |
| ybtPQdel_F               | AGTTACTCCATCGCTCACCGTTTATCC                                                                                                                                                                                                                | construct<br>Δ <i>ybtPQ</i>             |
| ybtPQdel_R               | GTGAGCGATGGAGTAACTGAATTTCTGATGAA                                                                                                                                                                                                           | construct<br>Δ <i>ybtPQ</i>             |
| ZnuA5.3                  | GATCGCTTTATCACAGTTAC                                                                                                                                                                                                                       | confirm<br><i>znuABC</i><br>integration |
| attTn7Yp-Fwd             | TCAGCTGCCACATGTCTGAAG                                                                                                                                                                                                                      | confirm                                 |

|                     |                            |                                  |
|---------------------|----------------------------|----------------------------------|
|                     |                            | <i>znuABC</i> integration        |
| pBAD-y1329-start    | CATCGACTTACAACCTTACATCACAG | confirm $\Delta y1329-1330::kan$ |
| Km2                 | CAATAGCAGCCAGTCCCTTC       | confirm $\Delta y1329-1330::kan$ |
| Y1245-3             | TTGAAAATAATCTGGAGT         | confirm $\Delta y1245::cat$      |
| Cm-2                | GAGATTTTCAGGAGCTAAGG       | confirm $\Delta 1245::cat$       |
| Irp Km1             | AAAGTCGGAGGATATCGC         | confirm <i>irp2::kan</i>         |
| Mini-kan-1          | TGCCTCTTCCGACCATCA         | confirm <i>irp2::kan</i>         |
| PP-7                | GGTTATCGACATAGACGG         | confirm $\Delta psn$             |
| PP-11               | CCGCGAGAAGTTAAATTC         | confirm $\Delta psn$             |
| Znu-dell            | AGGCTCAGCACAAACATG         | confirm $\Delta znuBC$           |
| ZnuC.5              | CCGAAGCCAGATTAAGG          | confirm $\Delta znuBC$           |
| ZnuA 3.2            | GTCCTTGTCCTCAATACTATAC     | confirm $\Delta znuA$            |
| ZnuA C.3            | CGCAGAGAAGGGAAATATCG       | confirm $\Delta znuA$            |
| tonB2-P1            | CCTGGCGAATAAGGCCTC         | confirm $\Delta hasB$            |
| tonB2-P2            | ATTTTGGCTAGTCGGGGC         | confirm $\Delta hasB$            |
| pPQXvector_2100_seq | AGGAAGCAGCCCAGTAGTAG       | confirm $\Delta ybtPQ$           |
| YbtP-24             | GCATAAACAGGGTTGTCTG        | confirm $\Delta ybtPQ$           |
| P27                 | TGCATGAGTGATGTTTCAG        | confirm $\Delta ybtX$            |
| P33                 | GCGAAATGGACTGGACAA         | confirm $\Delta ybtX$            |

- <sup>a</sup> For *Y. pestis* strains, a plus sign indicates an intact chromosomal 102-kb *pgm* locus. All other *Y. pestis* strains have a mutation within this locus or a deletion of the entire locus.
- <sup>b</sup> Ap<sup>r</sup>, Cm<sup>r</sup>, Gm<sup>r</sup>, Km<sup>r</sup>, Spc<sup>r</sup>, and Sm<sup>r</sup> indicate resistance to ampicillin, chloramphenicol, kanamycin, gentamicin, spectinomycin, and streptomycin, respectively.
- <sup>c</sup> Details on the construction of pUC19 $\Delta$ tonB2 and pKNG $\Delta$ tonB2 are included since these were omitted in Perry et al (Perry *et al.*, 2003b).

## REFERENCES

- Ausubel, F.M., Brent, R., Kingston, R.E., Moore, D.D., Seidman, J.G., Smith, J.A. and Struhl, K. (1987) Current Protocols in Molecular Biology. In. New York, N. Y.: John Wiley & Sons, pp.
- Bearden, S.W., Fetherston, J.D. and Perry, R.D. (1997) Genetic organization of the yersiniabactin biosynthetic region and construction of avirulent mutants in *Yersinia pestis*. *Infect Immun* **65**: 1659-1668.

- Choi, K.-H., Gaynor, J.B., White, K.G., Lopez, C., Bosio, C.M., Karkhoff-Schweizer, R.R. and Schweizer, H.P. (2005) A Tn7-based broad-range bacterial cloning and expression system. *Nat Methods* **2**: 443-448.
- Choi, K.-H. and Schweizer, H.P. (2006) mini-Tn7 insertion in bacteria with single *attTn7* sites: example *Pseudomonas aeruginosa*. *Nat Protocols* **1**: 153-161.
- Datsenko, K.A. and Wanner, B.L. (2000) One-step inactivation of chromosomal genes in *Escherichia coli* K-12 using PCR products. *Proc Natl Acad Sci U S A* **97**: 6640-6645.
- Desrosiers, D.C., Bearden, S.W., Mier, I., Jr., Abney, J., Paulley, J.T., Fetherston, J.D., *et al.* (2010) Znu is the predominant zinc importer in *Yersinia pestis* during *in vitro* growth but is not essential for virulence. *Infect Immun* **78**: 5163-5177.
- Fetherston, J.D., Bearden, S.W. and Perry, R.D. (1996) YbtA, an AraC-type regulator of the *Yersinia pestis* pesticin/yersiniabactin receptor. *Mol Microbiol* **22**: 315-325.
- Fetherston, J.D., Bertolino, V.J. and Perry, R.D. (1999) YbtP and YbtQ: two ABC transporters required for iron uptake in *Yersinia pestis*. *Mol Microbiol* **32**: 289-299.
- Fetherston, J.D., Kirillina, O., Bobrov, A.G., Paulley, J.T. and Perry, R.D. (2010) The yersiniabactin transport system is critical for the pathogenesis of bubonic and pneumonic plague. *Infect Immun* **78**: 2045-2052.
- Fetherston, J.D., Lillard, J.W., Jr. and Perry, R.D. (1995) Analysis of the pesticin receptor from *Yersinia pestis*: role in iron-deficient growth and possible regulation by its siderophore. *J Bacteriol* **177**: 1824-1833.
- Fetherston, J.D., Schuetze, P. and Perry, R.D. (1992) Loss of the pigmentation phenotype in *Yersinia pestis* is due to the spontaneous deletion of 102 kb of chromosomal DNA which is flanked by a repetitive element. *Mol Microbiol* **6**: 2693-2704.
- Geoffroy, V.A., Fetherston, J.D. and Perry, R.D. (2000) *Yersinia pestis* YbtU and YbtT are involved in synthesis of the siderophore yersiniabactin but have different effects on regulation. *Infect Immun* **68**: 4452-4461.
- Gong, S., Bearden, S.W., Geoffroy, V.A., Fetherston, J.D. and Perry, R.D. (2001) Characterization of the *Yersinia pestis* Yfu ABC iron transport system. *Infect Immun* **67**: 2829-2837.
- Hazlett, K.R.O., Rusnak, F., Kehres, D.G., Bearden, S.W., La Vake, C.J., La Vake, M.E., *et al.* (2003) The *Treponema pallidum* *tro* operon encodes a multiple metal transporter, a zinc-dependent transcriptional repressor, and a semi-autonomously expressed phosphoglycerate mutase. *J Biol Chem* **278**: 20687-20694.
- Kaniga, K., Delor, I. and Cornelis, G.R. (1991) A wide-host-range suicide vector for improving reverse genetics in Gram-negative bacteria: inactivation of the *blaA* gene of *Yersinia enterocolitica*. *Gene* **109**: 137-141.
- Lathem, W.W., Price, P.A., Miller, V.L. and Goldman, W.E. (2007) A plasminogen-activating protease specifically controls the development of primary pneumonic plague. *Science* **315**: 509-513.



- Perry, R.D., Abney, J., Mier, I., Jr., Lee, Y., Bearden, S.W. and Fetherston, J.D. (2003a) Regulation of the *Yersinia pestis* Yfe and Ybt iron transport systems. *Adv Exp Med Biol* **529**: 275-283.
- Perry, R.D., Pendrak, M.L. and Schuetze, P. (1990) Identification and cloning of a hemin storage locus involved in the pigmentation phenotype of *Yersinia pestis*. *J Bacteriol* **172**: 5929-5937.
- Perry, R.D., Shah, J., Bearden, S.W., Thompson, J.M. and Fetherston, J.D. (2003b) *Yersinia pestis* TonB: role in iron, heme and hemoprotein utilization. *Infect Immun* **71**: 4159-4162.
- Rossi, M.-S., Fetherston, J.D., Létoffé, S., Carniel, E., Perry, R.D. and Ghigo, J.-M. (2001) Identification and characterization of the hemophore-dependent heme acquisition system of *Yersinia pestis*. *Infect Immun* **69**: 6707-6717.
- Yanisch-Perron, C., Vieira, J. and Messing, J. (1985) Improved M13 phage cloning vectors and host strains: nucleotide sequences of the M13mp18 and pUC19 vectors. *Gene* **33**: 103-119.
